# Supplementary material for: Chromium Methionine and Ractopamine Supplementation in Summer Diets for Grower–Finisher Pigs Reared under Heat Stress
Source: MDPI journal article supplement (doi:10.3390/ani13162671), 2023-08-19
Supplement: s1 [file s1]

**Table S1.** Blood metabolites from pigs sampled at 47 d of experimental period.

| Parameter                             | Treatments        |                  |                       |                       | SEM <sup>5</sup> | <i>p</i> -Value <sup>6</sup> |
|---------------------------------------|-------------------|------------------|-----------------------|-----------------------|------------------|------------------------------|
|                                       | CONT <sup>1</sup> | RAC <sup>2</sup> | Met-Cr-S <sup>3</sup> | Met-Cr-L <sup>4</sup> |                  |                              |
| Red blood cells, 1X10 <sup>3</sup> uL | 5.18              | 5.17             | 5.11                  | 4.94                  | 0.074            | 0.648                        |
| Hemoglobin, g/dL                      | 15.28             | 15.31            | 15.07                 | 14.53                 | 0.221            | 0.579                        |
| Hematocrit, %                         | 45.00             | 45.08            | 44.52                 | 42.89                 | 0.643            | 0.603                        |
| Leukocytes, 1X10 <sup>3</sup> uL      | 18.07             | 18.50            | 15.71                 | 19.04                 | 0.609            | 0.249                        |
| MCV <sup>7</sup>                      | 86.88             | 87.20            | 87.11                 | 86.80                 | 0.090            | 0.365                        |
| MCH <sup>8</sup>                      | 29.49             | 29.61            | 29.49                 | 29.39                 | 0.038            | 0.267                        |
| MCHC <sup>9</sup>                     | 33.95             | 33.96            | 33.84                 | 33.86                 | 0.025            | 0.225                        |
| Lymphocytes, 1X10 <sup>3</sup> uL     | 11.01             | 10.41            | 8.71                  | 10.41                 | 0.399            | 0.227                        |
| Platelets, 1X10 <sup>3</sup> uL       | 171.20            | 184.80           | 153.00                | 178.90                | 13.377           | 0.849                        |
| Glucose, mg/dL                        | 76.58             | 75.82            | 91.40                 | 89.74                 | 2.898            | 0.128                        |
| Total proteins, g/dL                  | 7.24              | 7.17             | 7.10                  | 7.05                  | 0.111            | 0.933                        |
| Albumin, g/dL                         | 2.95              | 3.01             | 2.84                  | 2.83                  | 0.049            | 0.508                        |
| Ck <sup>10</sup> , u/L                | 93.06             | 158.26           | 109.99                | 166.36                | 10.546           | 0.198                        |
| Cortisol, µg/dL                       | 3.96              | 2.76             | 4.79                  | 3.14                  | 0.326            | 0.151                        |

<sup>1</sup> CONT: control animals receiving only the basal diet without supplementation; <sup>2</sup> RAC: animals receiving the basal diet supplemented with 10 ppm ractopamine during the last phase (34 d); <sup>3</sup> Met-Cr-S: animals receiving the basal diet supplemented with 0.8 ppm of Cr from chromium methionine only during the last phase for a short period (34 d); <sup>4</sup> Met-Cr-L: animals receiving the basal diet supplemented with 0.8 ppm of Cr from chromium methionine used in all phases for a long period (81 d); <sup>5</sup> SEM: standard error of the mean; <sup>6</sup> Probability values associated with the effects of chromium methionine or ractopamine supplementation in diets of pigs; <sup>7</sup> MCV: mean corpuscular volume; <sup>8</sup> MCH: mean corpuscular hemoglobin; <sup>9</sup> MCHC: mean corpuscular hemoglobin concentration; <sup>10</sup> CK: creatine kinase.

**Table S2.** Blood metabolites from pigs sampled at 81 d of feeding period

| Parameter                             | Treatments         |                    |                       |                       | SEM <sup>5</sup> | <i>p</i> -Value <sup>6</sup> |
|---------------------------------------|--------------------|--------------------|-----------------------|-----------------------|------------------|------------------------------|
|                                       | CONT <sup>1</sup>  | RAC <sup>2</sup>   | Met-Cr-S <sup>3</sup> | Met-Cr-L <sup>4</sup> |                  |                              |
| Red blood cells, 1X10 <sup>3</sup> uL | 5.25               | 5.36               | 5.29                  | 5.05                  | 0.063            | 0.365                        |
| Hemoglobin, g/dL                      | 15.48              | 15.79              | 15.56                 | 14.91                 | 0.186            | 0.403                        |
| Hematocrit, %                         | 45.72              | 46.57              | 45.85                 | 44.02                 | 0.548            | 0.421                        |
| Leukocytes, 1X10 <sup>3</sup> uL      | 16.90              | 16.88              | 15.02                 | 16.24                 | 0.561            | 0.610                        |
| MCV <sup>7</sup>                      | 87.10              | 86.88              | 86.89                 | 87.20                 | 0.073            | 0.333                        |
| MCH <sup>8</sup>                      | 29.49              | 29.45              | 29.40                 | 29.52                 | 0.024            | 0.323                        |
| MCHC <sup>9</sup>                     | 33.85              | 33.90              | 33.86                 | 33.87                 | 0.010            | 0.333                        |
| Lymphocytes, 1X10 <sup>3</sup> uL     | 9.67               | 8.69               | 7.71                  | 9.42                  | 0.440            | 0.409                        |
| Platelets, 1X10 <sup>3</sup> uL       | 222.40             | 206.30             | 192.20                | 180.90                | 11.280           | 0.600                        |
| Glucose, mg/dL                        | 84.98              | 86.08              | 78.70                 | 86.81                 | 2.085            | 0.512                        |
| Total proteins, g/dL                  | 8.02 <sup>ab</sup> | 8.59 <sup>a</sup>  | 8.07 <sup>ab</sup>    | 7.81 <sup>b</sup>     | 0.085            | 0.023                        |
| Albumin, g/dL                         | 3.34 <sup>b</sup>  | 3.62 <sup>a</sup>  | 3.55 <sup>ab</sup>    | 3.39 <sup>ab</sup>    | 0.032            | 0.020                        |
| CK <sup>10</sup> , u/L                | 29.79 <sup>b</sup> | 78.25 <sup>a</sup> | 36.44 <sup>b</sup>    | 37.67 <sup>b</sup>    | 4.659            | 0.004                        |
| Cortisol, µg/dL                       | 2.47               | 2.42               | 2.42                  | 3.15                  | 0.270            | 0.727                        |

<sup>1</sup> CONT: control animals receiving only the basal diet without supplementation; <sup>2</sup> RAC: animals receiving the basal diet supplemented with 10 ppm ractopamine during the last phase (34 d); <sup>3</sup> Met-Cr-S: animals receiving the basal diet supplemented with 0.8 ppm of Cr from chromium methionine only during the last phase for a short period (34 d); <sup>4</sup> Met-Cr-L: animals receiving the basal diet supplemented with 0.8 ppm of Cr from chromium methionine used in all phases for a long period (81 d); <sup>5</sup> SEM: standard error of the mean; <sup>6</sup> Probability values associated with the effects of chromium methionine or ractopamine supplementation in diets of pigs; <sup>7</sup> MCV: mean corpuscular volume; <sup>8</sup> MCH: mean corpuscular hemoglobin; <sup>9</sup> MCHC: mean corpuscular hemoglobin concentration; <sup>10</sup> CK: creatine kinase; <sup>a,b</sup> Within rows, means with different superscripts letter were significantly different ( $P < 0.05$ ).

**Table S3.** Organ weight as a percentage of live weight (%).

| Parameter  | Treatments        |                  |                       |                       | SEM <sup>5</sup> | <i>p</i> -Value <sup>6</sup> |
|------------|-------------------|------------------|-----------------------|-----------------------|------------------|------------------------------|
|            | CONT <sup>1</sup> | RAC <sup>2</sup> | Met-Cr-S <sup>3</sup> | Met-Cr-L <sup>4</sup> |                  |                              |
| Liver, %   | 1.43              | 1.44             | 1.46                  | 1.54                  | 0.025            | 0.429                        |
| Heart,%    | 0.34              | 0.32             | 0.31                  | 0.31                  | 0.006            | 0.369                        |
| Lungs,%    | 0.98              | 0.88             | 0.88                  | 0.84                  | 0.033            | 0.447                        |
| Stomach, % | 0.53              | 0.51             | 0.53                  | 0.54                  | 0.012            | 0.809                        |
| Spleen, %  | 0.17              | 0.16             | 0.28                  | 0.16                  | 0.026            | 0.339                        |
| Kidneys, % | 0.31              | 0.26             | 0.29                  | 0.30                  | 0.007            | 0.119                        |

<sup>1</sup> CONT: control animals receiving only the basal diet without supplementation; <sup>2</sup> RAC: animals receiving the basal diet supplemented with 10 ppm ractopamine during the last phase (34 d); <sup>3</sup> Met-Cr-S: animals receiving the basal diet supplemented with 0.8 ppm of Cr from chromium methionine only during the last phase for a short period (34 d); <sup>4</sup> Met-Cr-L: animals receiving the basal diet supplemented with 0.8 ppm of Cr from chromium methionine used in all phases for a long period (81 d); <sup>5</sup> SEM: standard error of the mean; <sup>6</sup> Probability values associated with the effects of chromium methionine or ractopamine supplementation in diets of pigs.

**Table S4.** Proximate analysis and physicochemical characteristics of meat from pigs supplemented with chromium methionine or ractopamine under heat stress conditions.

|                                 | Treatments <sup>1</sup> |                  |                       |                       |                  |                              |
|---------------------------------|-------------------------|------------------|-----------------------|-----------------------|------------------|------------------------------|
| Variables                       | CONT <sup>1</sup>       | RAC <sup>2</sup> | Met-Cr-S <sup>3</sup> | Met-Cr-L <sup>4</sup> | SEM <sup>5</sup> | <i>p</i> -Value <sup>6</sup> |
| <i>Proximate Analysis</i>       |                         |                  |                       |                       |                  |                              |
| Moisture, %                     | 70.97                   | 71.43            | 71.59                 | 71.92                 | 0.42             | 0.462                        |
| Fat, %                          | 2.02                    | 1.86             | 2.07                  | 1.76                  | 0.40             | 0.942                        |
| Protein crude, %                | 21.70                   | 21.10            | 20.16                 | 22.23                 | 0.63             | 0.142                        |
| Ash; %                          | 1.24                    | 1.37             | 1.38                  | 1.20                  | 0.12             | 0.601                        |
| <i>Physicochemical Analysis</i> |                         |                  |                       |                       |                  |                              |
| pH                              | 5.48                    | 5.43             | 5.46                  | 5.47                  | 5.02             | 0.905                        |
| WHC <sup>7</sup> , %            | 78.34                   | 78.69            | 79.35                 | 77.04                 | 1.44             | 0.720                        |
| WBSF <sup>8</sup> , Kg          | 6.95                    | 6.56             | 6.39                  | 6.07                  | 0.32             | 0.275                        |
| Cooking loss, %                 | 21.71                   | 22.92            | 21.52                 | 21.67                 | 1.15             | 0.812                        |

<sup>1</sup> CONT: control animals receiving only the basal diet without supplementation; <sup>2</sup> RAC: animals receiving the basal diet supplemented with 10 ppm ractopamine during the last phase (34 d); <sup>3</sup> Met-Cr-S: animals receiving the basal diet supplemented with 0.8 ppm of Cr from chromium methionine only during the last phase for a short period (34 d); <sup>4</sup> Met-Cr-L: animals receiving the basal diet supplemented with 0.8 ppm of Cr from chromium methionine used in all phases for a long period (81 d); <sup>5</sup> SEM: standard error of the mean. <sup>6</sup> Probability values associated with the effects of chromium methionine or ractopamine supplementation in the diets of pigs; <sup>7</sup> WHC: water holding capacity; <sup>8</sup> WBSF: warner–bratzler shear force.
